# Supplementary material
Source: Copernicus journal article supplement (doi:10.5194/nhess-26-2169-2026)
Supplement: Supplementary file [file nhess-26-2169-2026-supplement-title-page.pdf › nhess-26-2169-2026-supplement-title-page.pdf]

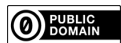

*Supplement of*

## **Hazard potential of compound flooding from rainfall, storm surge, and groundwater in coastal New York and Connecticut**

**Robin Glas et al.**

*Correspondence to:* Robin Glas ([rglas@usgs.gov](mailto:rglas@usgs.gov))

- [nhess-26-2169-2026-supplement-title-page.pdf](#)
- [Glas\\_etal\\_Supplementary\\_Tables\\_revised.xlsx](#)

The copyright of individual parts of the supplement might differ from the article licence.
